# Supplementary material for: Methods for Preserving Cellular and Milk Fat Globules RNA from Human Milk Samples
Source: Research Square preprint supplement (doi:10.21203/rs.3.rs-6968867/v1), 2025-07-01
Supplement: Supplementary file 1 [file 54b73762fd9446b38e297743.xlsx]

## Sheet: Sheet1
Sampel Number	Infant age at sample collection	Time until RNAlater added/sample was frozen (h)	Sample Types	Detacted Total Concentrition (ng/uL)	A260/A280	A260/A230	RQN	28s/18s
1	Day 30	0.5	BMR F	139.215	2.098	0.135	9	1.7
2	Day 30	0.5	BMR C	21.581	1.637	0.034	6.3	1.5
3	Day 30	0.5	BM F	72.479	1.856	0.242	1.4	0
4	Day 30	0.5	BM C	25.715	1.66	0.106	2.2	0
5	6 Months	1	BMR F	98.511	2.015	0.106	8.4	1.6
6	6 Months	1	BMR C	17.808	1.601	0.047	5.7	2.1
7	6 Months	1	BM F	66.356	1.96	0.132	1.5	0
8	6 Months	1	BM C	18.962	1.574	0.073	2.2	0
9	Day 30	1.2	BMR F	68.944	1.834	1.057	9.5	1.6
10	Day 30	1.2	BMR C	12.493	1.453	0.082	8.6	1.9
11	Day 30	1.2	BM F	55.682	1.818	1.238	1.2	0
12	Day 30	1.2	BM C	18.05	1.589	0.496	2	0
13	Day 30	1.3	BMR F	44.85	1.761	0.792	8.9	1.5
14	Day 30	1.3	BMR C	27.586	1.714	0.748	8.9	1.5
15	Day 30	1.3	BM F	89.575	1.964	1.555	1.3	0
16	Day 30	1.3	BM C	36.682	1.764	1.043	3	1.6
17	Day 30	2	BMR F	115.156	1.955	1.72	6.1	1.6
18	Day 30	2	BMR C	22.074	1.721	0.741	8.1	1.3
19	Day 30	2	BM F	72.216	1.894	1.352	1.1	0
20	Day 30	2	BM C	31.234	1.385	0.469	2.3	0
21	Day 30	2	BMR F	146.053	1.92	1.721	7	1.6
22	Day 30	2	BMR C	24.009	1.485	0.653	6.5	1.7
23	Day 30	2	BM F	158.433	1.836	1.36	1.4	0
24	Day 30	2	BM C	98.83	1.273	0.716	3.1	1.9
25	3 Months	2.5	BMR F	252.717	1.994	1.636	9.3	2.1
26	3 Months	2.5	BMR C	33.755	1.495	0.742	6.8	1.7
27	3 Months	2.5	BM F	179.624	2.009	1.803	1.9	0.6
28	3 Months	2.5	BM C	29.464	1.51	0.865	2.7	0.9
29	Day 7	3.3	BMR F	404.306	2.067	1.886	9.8	1.9
30	Day 7	3.3	BMR C	54.606	1.902	1.095	9.8	1.7
31	Day 7	3.3	BM F	81.651	2.024	1.465	1.2	0
32	Day 7	3.3	BM C	104.657	1.96	1.758	2.5	1.1
33	3 Months	3.5	BMR F	55.943	1.803	1.169	3	0.7
34	3 Months	3.5	BMR C	18.239	1.364	0.604	5.2	1.4
35	3 Months	3.5	BM F	47.257	1.743	1.437	1.1	0
36	3 Months	3.5	BM C	15.007	1.341	0.496	2.6	1.8
37	Day 30	4.3	BMR F	108.613	1.947	1.348	9.5	1.7
38	Day 30	4.3	BMR C	14.305	1.56	0.522	7	1.4
39	Day 30	4.3	BM F	53.047	1.788	1.186	1.1	0
40	Day 30	4.3	BM C	10.854	1.867	0.456	1.2	0
41	6 Months	4.5	BMR F	56.446	1.942	1.179	6.8	1.2
42	6 Months	4.5	BMR C	38.214	1.601	0.762	4.6	1.4
43	6 Months	4.5	BM F	32.679	1.722	0.742	1.2	0
44	6 Months	4.5	BM C	17.854	1.586	0.682	3.2	0.6
45	Day 50	6.5	BMR F	629.958	1.974	1.963	9.6	2.3
46	Day 50	6.5	BMR C	38.696	1.885	0.52	5.3	1.8
47	Day 50	6.5	BM F	334.292	2.039	1.65	2.6	0.9
48	Day 50	6.5	BM C	34.133	1.753	1.036	1.8	0
49	Day 30	7	BMR F	47.092	1.683	1.014	7.7	2
50	Day 30	7	BMR C	68.203	1.223	0.694	6.5	1.9
51	Day 30	7	BM F	50.492	1.418	0.88	1	0
52	Day 30	7	BM C	25.831	1.236	0.573	3.6	1.6
53	Day 30	8.5	BMR F	117.662	1.574	1.153	8.4	3
54	Day 30	8.5	BMR C	59.926	1.228	0.679	4.1	0
55	Day 30	8.5	BM F	60.603	1.697	0.865	1	0
56	Day 30	8.5	BM C	42.198	1.172	0.667	2.1	0.6
57	Day 30	11.6	BMR F	49.627	1.8	0.472	6.3	1.4
58	Day 30	11.6	BMR C	24.294	1.384	0.704	3.6	1.5
59	Day 30	11.6	BM F	83.699	1.56	1.119	1	0
60	Day 30	11.6	BM C	10.175	1.454	0.696	1	0
61	3 Months	12	BMR F	47.458	1.621	0.994	3.5	4.7
62	3 Months	12	BMR C	8.334	1.316	0.364	2.9	1.4
63	3 Months	12	BM F	38.544	1.704	1.08	1	0
64	3 Months	12	BM C	20.452	1.275	0.454	3.1	0
