# Supplementary material for: Methods for Preserving Cellular and Milk Fat Globules RNA from Human Milk Samples
Source: Research Square preprint supplement (doi:10.21203/rs.3.rs-6968867/v1), 2025-07-01
Supplement: Supplementary file 2 [file 5dbd7228cd9edd290b053ba1.xlsx]

## Sheet: Sheet1
Table S2: qPCR primers
Gene name	Forward	Reverse
hPRLR	CATGGTGACCTGCATCTTTCC	GTGGGAGGAAAGTCTTGGCATC
hLALBA	CCTGGATGATGACATTACTGA	ACACTCACAACTTCTCACAA
hPTPRC	CTTCAGTGGTCCCATTGTGGTG	CCACTTTGTTCTCGGCTTCCAG
hACTB	GCCCTGAGGCACTCTTCCA	CGGATGTCCACGTCACACTTC
